# Supplementary material for: Chiral tectonics toward square planar tetranuclear Pd(ii) complexes: propagation of axial chirality through a long molecular axis
Source: Royal Society of Chemistry journal article supplement (doi:10.1039/c9dt01913h), 2019-01-01
Supplement: c9dt01913h1.pdf [file c9dt01913h1.pdf]

## Supporting Information for

### **Chiral Tectonics toward Square Planar Tetranuclear Pd(II) Complexes: Propagation of Axial Chirality through a Long Molecular Axis**

Yutaro Goto,<sup>a</sup> Yutaka Watanabe,<sup>a</sup> Aoki Noboriguchi,<sup>a</sup> Jun Yoshida,<sup>b</sup> Shigeki Mori<sup>c</sup> and Hisako Sato<sup>a\*</sup>

<sup>a</sup>Department of Chemistry, Graduate School of Science and Engineering, Ehime University, Matsuyama 790-8577, Japan, [sato.hisako.my@ehime-u.ac.jp](mailto:sato.hisako.my@ehime-u.ac.jp)

<sup>b</sup>Department of Chemistry, Kitasato University, Sagamihara, 252-0329, Japan

<sup>c</sup>Advanced Research Support Center, Ehime University, Matsuyama 790-8577, Japan

### Contents

- 1. The <sup>1</sup>H NMR, <sup>13</sup>C NMR and mass analyses of Pd (II) complexes**
- 2. The chromatographic resolution of tetranuclear Pd(II) complexes**
- 3. The ECD spectra of dinuclear Pd(II) complexes**
- 4. The calculated VCD spectra of dinuclear Pd(II) complexes**
- 5. The crystal data and the table of selected bond lengths and torsion angles**

## S1. The $^1\text{H}$ NMR, $^{13}\text{C}$ NMR and mass analyses of Pd (II) complexes

**Tpret.**  $^1\text{H}$  NMR (500 MHz,  $\text{CDCl}_3$ ):  $\delta=2.25$  (8H, q,  $J=7.5$  Hz,  $\text{CH}_2$ ), 1.09 ppm (12H, t,  $J=7.5$  Hz,  $\text{CH}_3$ );  $^{13}\text{C}$  NMR (125 MHz,  $\text{CDCl}_3$ ):  $\delta=195.5$  ( $\text{C}_{\text{CO}}$ ), 106.1 ( $\text{C}_{1,2}$ ), 29.3 ( $\text{C}_{\text{methylene}}$ ), 8.9 ( $\text{C}_{\text{methyl}}$ ), ppm; LRMS ( $\text{FAB}^+$ , 3-NBA) calcd for  $\text{C}_{14}\text{H}_{22}\text{O}_4$ , found  $m/z=255$  [ $\text{M}+\text{H}$ ]

**[(hfac)Pd(II)]<sub>2</sub>(tpret) (1).**  $^1\text{H}$  NMR (500 MHz,  $\text{CDCl}_3$ ):  $\delta=6.21$  (2H, s, CH), 2.15 (8H, q,  $J=7.5$  Hz,  $\text{CH}_2$ ), 1.02 ppm (12H, t,  $J=7.5$  Hz,  $\text{CH}_3$ ).

**[(taetH)Pd(II)]<sub>2</sub>(tpret)(2).**  $^1\text{H}$  NMR (500 MHz,  $\text{CDCl}_3$ ):  $\delta=2.17$  (8H, q,  $J=7.4$  Hz,  $\text{CH}_2$ ), 2.00 (12H, s,  $\text{CH}_3$ ), 1.97 (12H, s,  $\text{CH}_3$ ), 1.04 ppm (12H, t,  $J=7.4$  Hz,  $\text{CH}_3$ );  $^{13}\text{C}$  NMR (125 MHz,  $\text{CDCl}_3$ ):  $\delta=192.8$  ( $\text{C}_{\text{CO}}$ ), 190.4 ( $\text{C}_{\text{CO}}$ ), 187.6 ( $\text{C}_{\text{CO}}$ ), 111.8 ( $\text{C}_{\text{vinyl}}$ ), 110.1 ( $\text{C}_{\text{vinyl}}$ ), 108.1 ( $\text{C}_{\text{vinyl}}$ ), 31.5 ( $\text{C}_{\text{methylene}}$ ), 26.3 ( $\text{C}_{\text{methyl}}$ ), 23.2 ( $\text{C}_{\text{methyl}}$ ), 9.85 ( $\text{C}_{\text{methyl}}$  in Et) ppm; HRMS ( $\text{ESI}^+$ ,  $\text{CH}_3\text{CN}/\text{H}_2\text{O}$ ) calcd for  $\text{C}_{34}\text{H}_{46}\text{O}_{12}^{106}\text{Pd}^{108}\text{Pd}+\text{H}$  861.1146, found  $m/z=861.1149$  [ $\text{M}+\text{H}$ ]. The product isolated was analyzed by HPLC ( $\text{SiO}_2$ ) and showed to be pure.

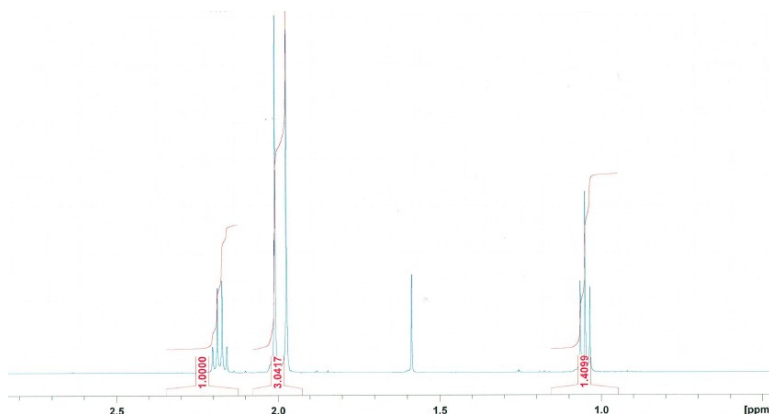

$^1\text{H}$  NMR (2)

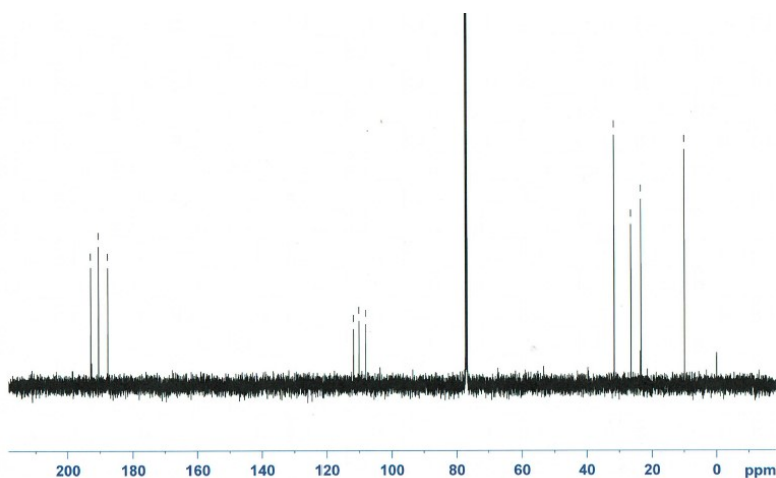

### $^{13}\text{C}$ NMR (2)

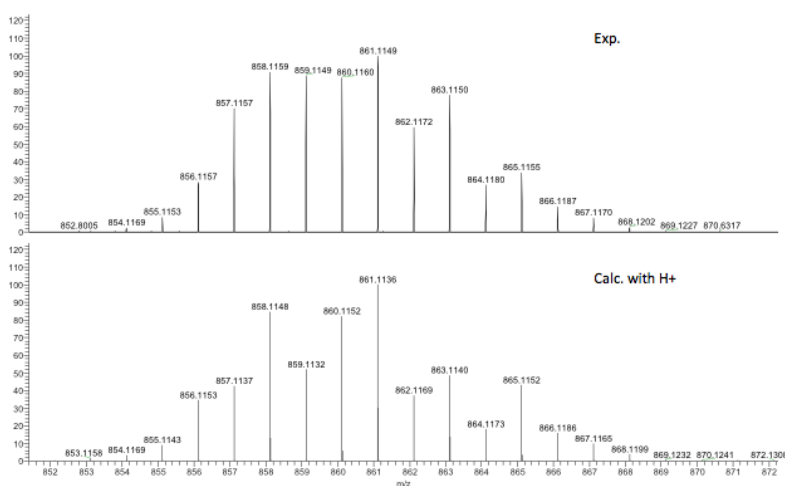

### HRMS (2)

**[[*hfac*Pd(II)(*taet*)Pd(II)]<sub>2</sub>(*tpret*)] (4).**  $^1\text{H}$  NMR (500 MHz,  $\text{CDCl}_3$ ):  $\delta$ =6.25 (2H, s, CH), 2.17 (8H, q,  $J$ =7.5 Hz,  $\text{CH}_2$ ), 2.02 (12H, s,  $\text{CH}_3$ ), 1.96 (12H, s, CH), 1.04 (12H, t,  $J$ = 7.5 Hz,  $\text{CH}_3$ )

**[[*bzac*Pd(II)(*taet*)Pd(II)]<sub>2</sub>(*tpret*)] (5b).**  $^1\text{H}$  NMR (500 MHz,  $\text{CDCl}_3$ ):  $\delta$ =7.83 (4H, broad d,  $J$ =7.5 Hz, *o*-H), 7.47 (2H, broad t,  $J$ =7.5 Hz, *p*-H), 7.38 (4H, t,  $J$ =7.5 Hz, *m*-H), 6.06 (2H, s, CH), 2.20 (6H, s,  $\text{CH}_3$ ), 2.15 (8H, q,  $J$ =7.5 Hz,  $\text{CH}_2$ ), 1.973 (6H, s,  $\text{CH}_3$ ), 1.969 (6H, s,  $\text{CH}_3$ ), 1.96 (12H, s,  $\text{CH}_3$ ), 1.02 ppm (12H, t,  $J$ =7.5 Hz,  $\text{CH}_3$ );  $^{13}\text{C}$  NMR (125 MHz,  $\text{CDCl}_3$ ):  $\delta$ =190.5 (twice in integral ratio to signals of other carbonyl carbon atoms,  $\text{C}_{\text{CO}}$ ), 188.9 ( $\text{C}_{\text{CO}}$ ), 188.0 ( $\text{C}_{\text{CO}}$ ), 187.9 (twice,  $\text{C}_{\text{CO}}$ ), 187.6 ( $\text{C}_{\text{CO}}$ ), 180.5 ( $\text{C}_{\text{CO}}$ ),

135.9 ( $C_{\text{arom}}$ ), 131.5 ( $C_{\text{arom}}$ ), 128.3 ( $o\text{-}C_{\text{arom}}$ ), 127.5 ( $m\text{-}C_{\text{arom}}$ ), 112.1 (twice,  $C_{\text{vinyl}}$ ), 110.1 ( $C_{\text{vinyl}}$ ), 98.6 ( $C_{\text{vinyl}}$ ), 31.5 ( $C_{\text{methylene}}$ ), 26.21 (twice,  $C_{\text{methyl}}$ ), 26.17 ( $C_{\text{methyl}}$ ), 26.09 ( $C_{\text{methyl}}$ ), 26.01 ( $C_{\text{methyl}}$ ), 9.9 ( $C_{\text{methyl}}$  in Et) ppm; HRMS (ESI<sup>+</sup>, CH<sub>3</sub>CN/H<sub>2</sub>O) calcd for C<sub>54</sub>H<sub>62</sub>O<sub>16</sub>Pd<sub>4</sub>+H<sup>+</sup> 1391.0286, found  $m/z$ =1391.0299 [M+H<sup>+</sup>]. The product isolated was analyzed by HPLC (SiO<sub>2</sub>) and showed to be pure.

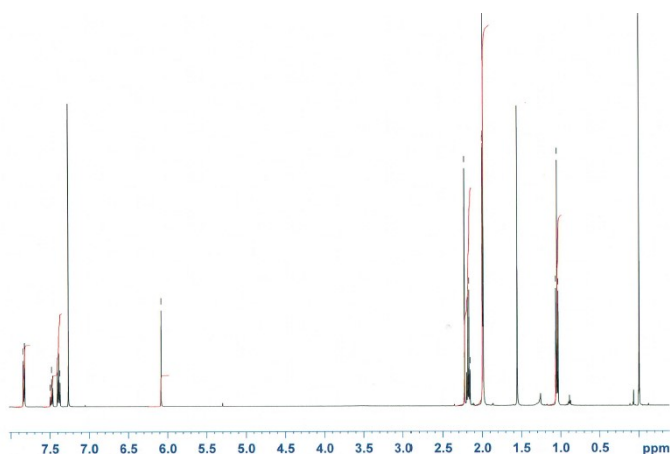

### <sup>1</sup>H NMR (5b)

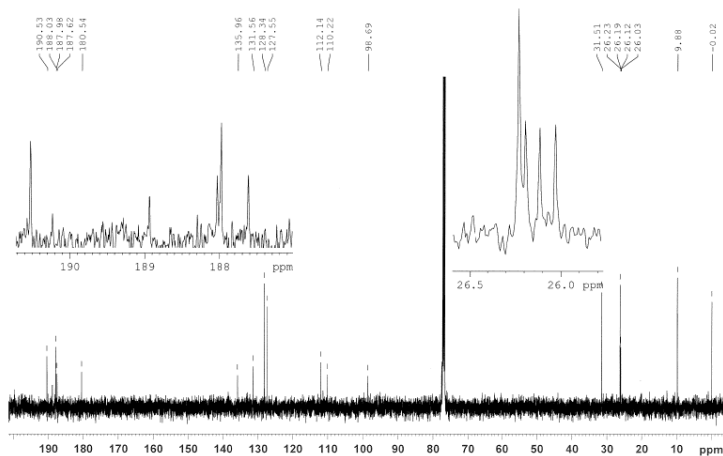

### <sup>13</sup>C NMR (5b)

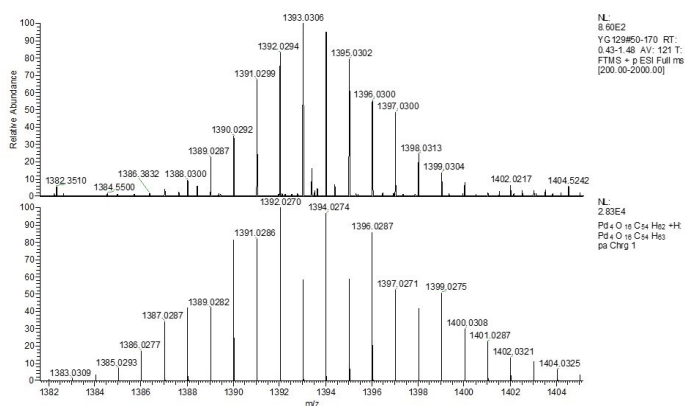

## HRMS (5b)

**[[{(dbm)Pd(II)(taet)Pd(II)}<sub>2</sub>(tpret)] (5a).** <sup>1</sup>H NMR(400 MHz, CDCl<sub>3</sub>): δ=7.93 (8H, broad d, *J*=8.0 Hz, *o*-H), 7.51 (4H, broad t, *J*=8.0 Hz, *p*-H), 7.42 (8H, broad t, *J*=8.0 Hz, *m*-H), 6.72 (2H, s, CH), 2.18 (8H, q, *J*=8.0 Hz, CH<sub>2</sub>), 2.02 (12H, s, CH<sub>3</sub>), 2.01 (12H, s, CH<sub>3</sub>), 1.05 ppm (12H, t, *J*=8.0 Hz, CH<sub>2</sub>); <sup>13</sup>C NMR (100 MHz, CDCl<sub>3</sub>): δ=190.5 (C<sub>CO</sub>), 188.0 (C<sub>CO</sub>), 187.8 (C<sub>CO</sub>), 182.1 (C<sub>CO</sub>), 136.6 (C<sub>arom</sub>), 131.6 (C<sub>arom</sub>), 128.4 (*o*-C<sub>arom</sub>), 127.6 (*m*-C<sub>arom</sub>), 112.14 (twice, C<sub>vinyl</sub>), 112.10 (C<sub>vinyl</sub>), 110.2 (C<sub>vinyl</sub>), 31.5 (C<sub>methylene</sub>), 26.3 (C<sub>methyl</sub>), 26.0 (C<sub>methyl</sub>), 9.9 (C<sub>methyl</sub>) ppm; HRMS (ESI<sup>+</sup>, CH<sub>3</sub>CN/H<sub>2</sub>O) calcd for C<sub>64</sub>H<sub>66</sub>O<sub>16</sub>Pd<sub>4</sub>+H<sup>+</sup> 1515.0568, found *m/z*=1515.0530 [M+H<sup>+</sup>]. The product isolated was analyzed by HPLC (SiO<sub>2</sub>) and showed to be pure.

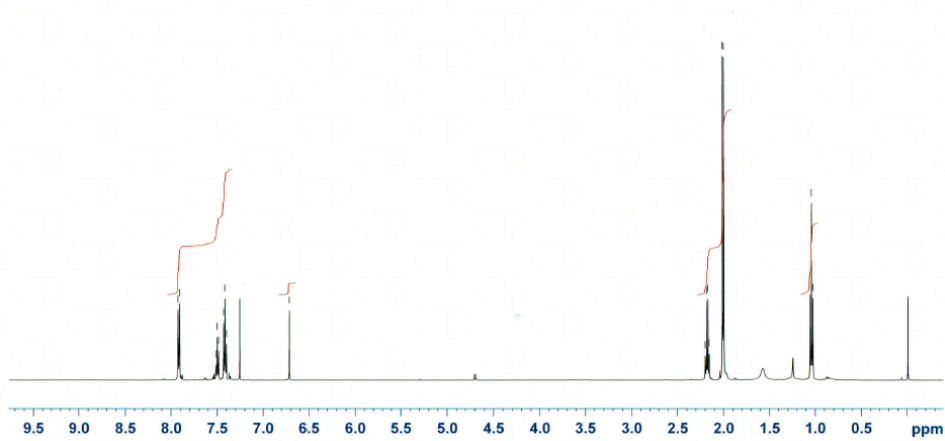

## <sup>1</sup>H NMR (5a)

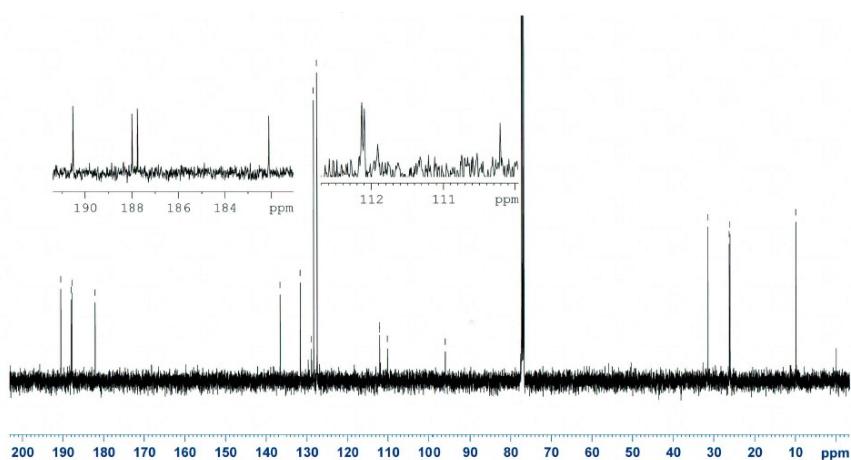

### $^{13}\text{C}$ NMR (**5a**)

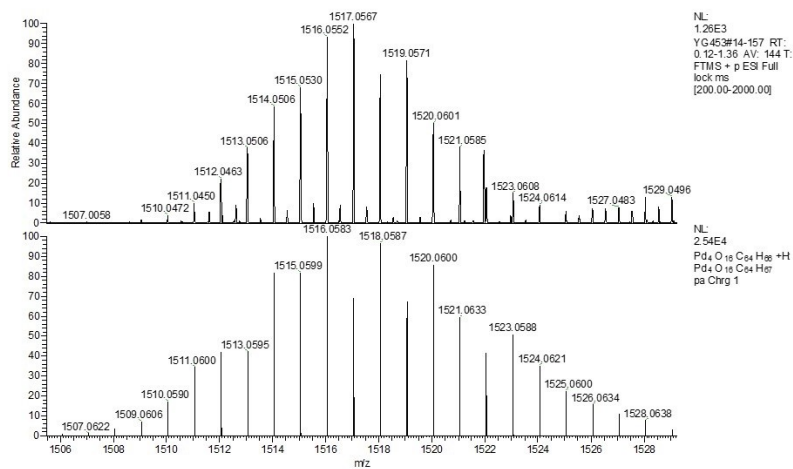

### HRMS (**5a**)

**[[*(npac)Pd(II)*]<sub>2</sub>(*taet*)] (**7b**).**  $^1\text{H}$  NMR (500 MHz,  $\text{CDCl}_3$ ):  $\delta$ =8.38 (2H, s, aromatic H<sub>1</sub>), 7.91-7.81 (8H, aromatic H<sub>3,4,5,8</sub>), 7.53 (2H, broad t,  $J$ =8.0 Hz, aromatic H<sub>6</sub>), 7.49 (2H, broad t,  $J$ =8.0 Hz, aromatic H<sub>7</sub>), 6.23 (2H, s, CH), 2.26 (6H, s, CH<sub>3</sub>), 2.03 (6H, s, CH<sub>3</sub>), 2.01 ppm (6H, s, CH<sub>3</sub>);  $^{13}\text{C}$  NMR (125 MHz,  $\text{CDCl}_3$ ):  $\delta$ =188.9 (C<sub>CO</sub>), 188.1 (C<sub>CO</sub>), 187.7 (C<sub>CO</sub>), 180.2 (C<sub>CO</sub>), 134.8 (C<sub>arom</sub>), 133.1 (C<sub>arom</sub>), 132.6 (C<sub>arom</sub>), 129.2 (C<sub>arom</sub>),

128.3 (C<sub>arom</sub>), 128.0 (C<sub>arom</sub>), 127.7 (C<sub>arom</sub>), 127.6 (C<sub>arom</sub>), 126.5 (C<sub>arom</sub>). 124.1 (C<sub>arom</sub>), 112.2 (C<sub>vinyl</sub>), 98.9 (C<sub>vinyl</sub>), 26.2 (C<sub>methyl</sub>), 26.1 (C<sub>methyl</sub>), 26.0 (C<sub>methyl</sub>) ppm; HRMS (FAB<sup>+</sup>, 3-NBA) calcd for C<sub>38</sub>H<sub>34</sub>O<sub>8</sub>Pd<sub>2</sub>+H<sup>+</sup> 833.0406, found *m/z*=833.0433 [M+H]. The product isolated was analyzed by HPLC (SiO<sub>2</sub>) and showed to be pure.

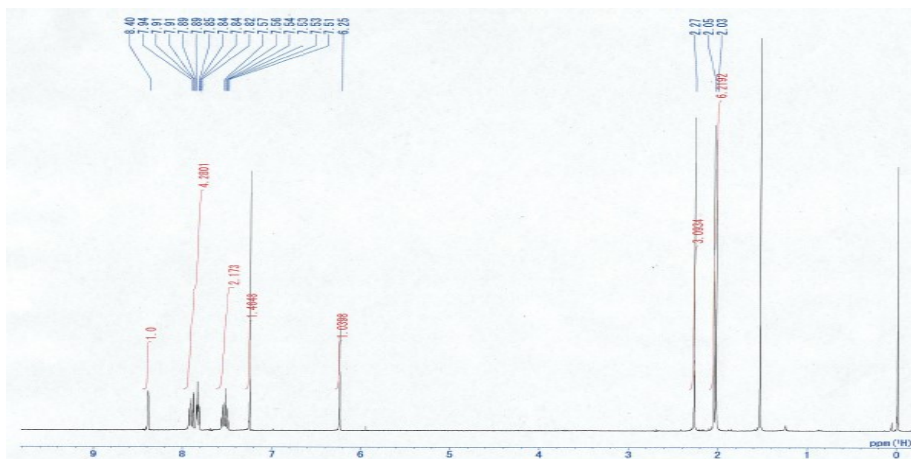

<sup>1</sup>H NMR (7b)

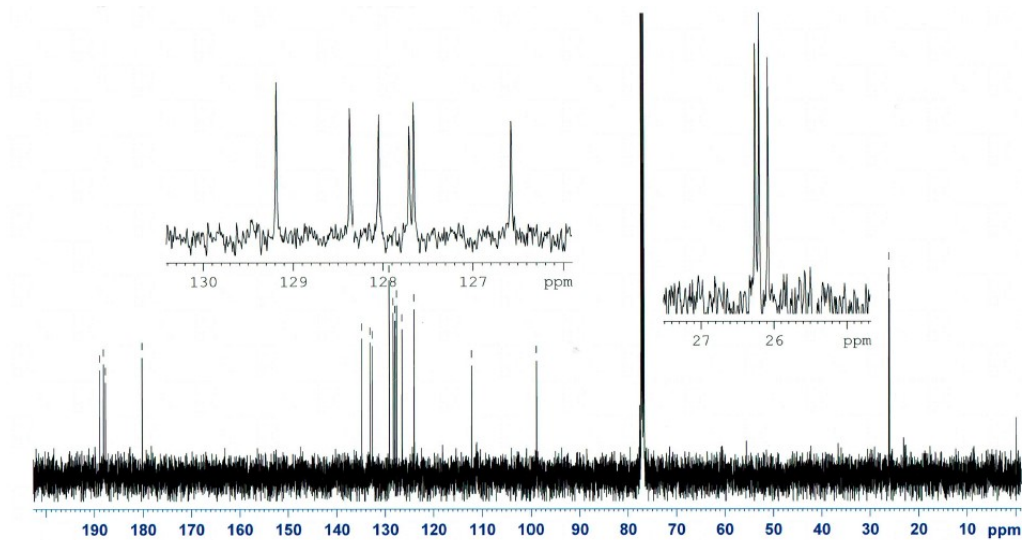

<sup>13</sup>C NMR (7b)

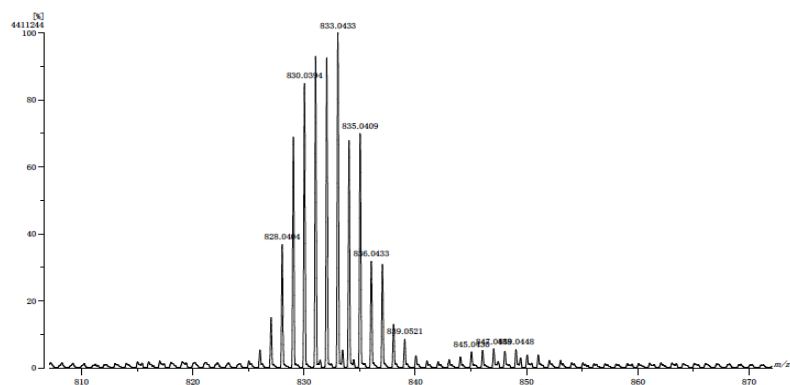

### HRMS (7b)

**[{(npac)Pd(II)(taet)Pd(II)}<sub>2</sub>(tpret)] (5c).** <sup>1</sup>H NMR(400 MHz, CDCl<sub>3</sub>): δ=8.40 (2H, s, aromatic H<sub>1</sub>), 7.94-7.80 (8H, aromatic H<sub>3,4,5,8</sub>), 7.56 (2H, broad t, *J*=8.0 Hz, aromatic H<sub>6</sub>), 7.52 (2H, broad t, *J*=8.0 Hz, aromatic H<sub>7</sub>), 6.25 (2H, s, CH), 2.28 (6H, s, CH<sub>3</sub>), 2.18 (8H, q, *J*=8.0 Hz, CH<sub>2</sub>), 2.04 (6H, s, CH<sub>3</sub>), 2.01 (6H, s, CH<sub>3</sub>), 2.00 (12H, s, CH<sub>3</sub>), 1.05 ppm (12H, t, *J*=8.0 Hz, CH<sub>3</sub>); <sup>13</sup>C NMR (100 MHz, CDCl<sub>3</sub>): δ=190.5 (twice, C<sub>CO</sub>), 188.9 (C<sub>CO</sub>), 188.05 (C<sub>CO</sub>), 187.98 (twice, C<sub>CO</sub>), 187.67 (C<sub>CO</sub>), 180.2 (C<sub>CO</sub>), 134.8 (C<sub>arom</sub>), 133.1 (C<sub>arom</sub>), 132.7 (C<sub>arom</sub>), 129.1 (C<sub>arom</sub>), 128.4 (C<sub>arom</sub>), 128.1 (C<sub>arom</sub>), 127.7 (C<sub>arom</sub>), 127.6 (C<sub>arom</sub>), 126.6 (C<sub>arom</sub>), 124.1 (C<sub>arom</sub>), 112.2 (C<sub>vinyl</sub>), 112.1 (C<sub>vinyl</sub>), 110.2 (C<sub>vinyl</sub>), 99.0 (C<sub>vinyl</sub>), 31.5 (C<sub>methylene</sub>), 26.26 (twice, C<sub>methyl</sub>), 26.24 (C<sub>methyl</sub>), 26.18 (C<sub>methyl</sub>), 26.06 (C<sub>methyl</sub>), 9.9 (C<sub>methyl</sub> in Et) ppm; HRMS (ESI<sup>+</sup>, CH<sub>3</sub>CN/H<sub>2</sub>O) calcd for C<sub>62</sub>H<sub>66</sub>O<sub>16</sub>Pd<sub>4</sub>+H<sup>+</sup> 1491.0568, found *m/z*=1491.0599 [M+H]. The product isolated was analyzed by HPLC (SiO<sub>2</sub>) and showed to be pure.

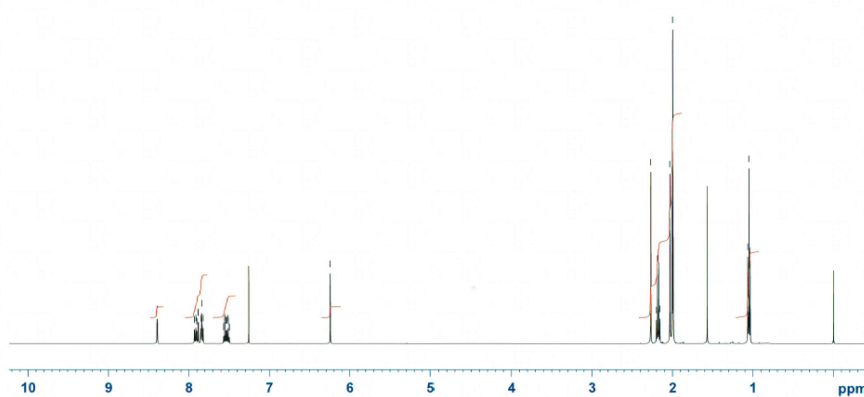

### <sup>1</sup>H NMR (5c)



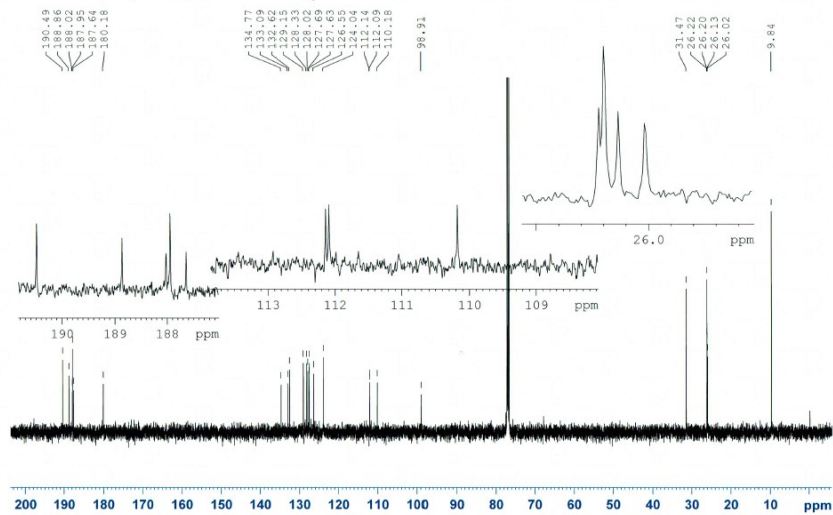

$^{13}\text{C}$  NMR (5c)

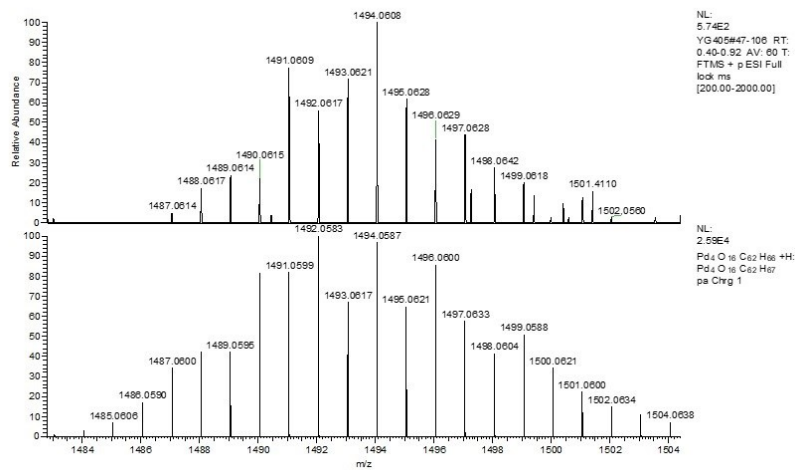

HRMS (5c)

## S2. HPLC chromatographic resolution of Pd(II) complexes

The chromatograms are shown below when Pd(II) complexes were resolved on a chiral HPLC column:

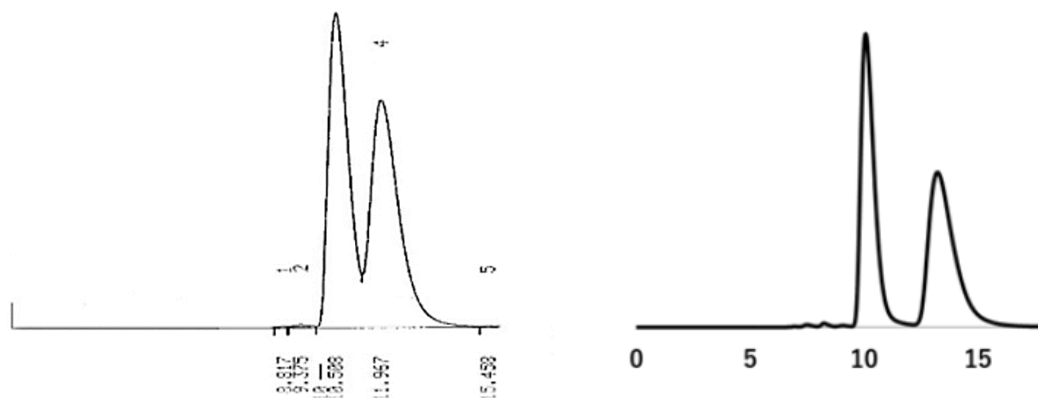

**Figure S1.** The HPLC chromatogram when  $[\{(bzac)Pd(II)(taet)Pd(II)\}_2(tpret)]$  (**5b**) and  $[\{(npac)Pd(II)(taet)Pd(II)\}_2(tpret)]$  (**5c**) was eluted on a 4 mm (i.d.)  $\times$  25 cm column (IC Daicel, Japan) at a flow rate of 0.5 ml/min. The eluent was dichloromethane with 0.07% methanol. The monitoring wavelength was 400 nm.

### S3. ECD spectra of dinuclear Pd(II) complexes

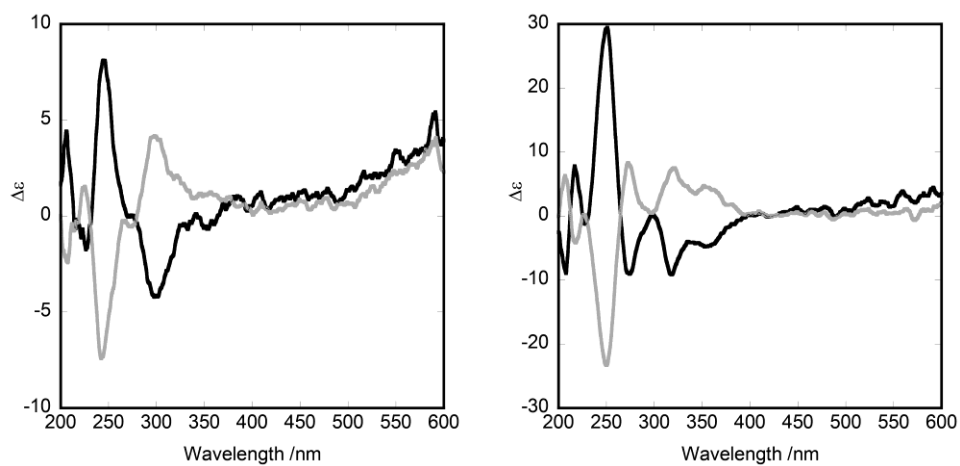

**Figure S2.** The ECD spectra of  $[\{(bzac)Pd(II)\}_2(taet)]$  (**7a**) (left) and  $[\{(npac)Pd(II)\}_2(taet)]$  (**7b**) (right) resolved on a chiral column. The solid and grey lines indicated the less and more retaining fractions, respectively. The solvent was acetonitrile.

#### S4. DFT calculation of IR and VCD

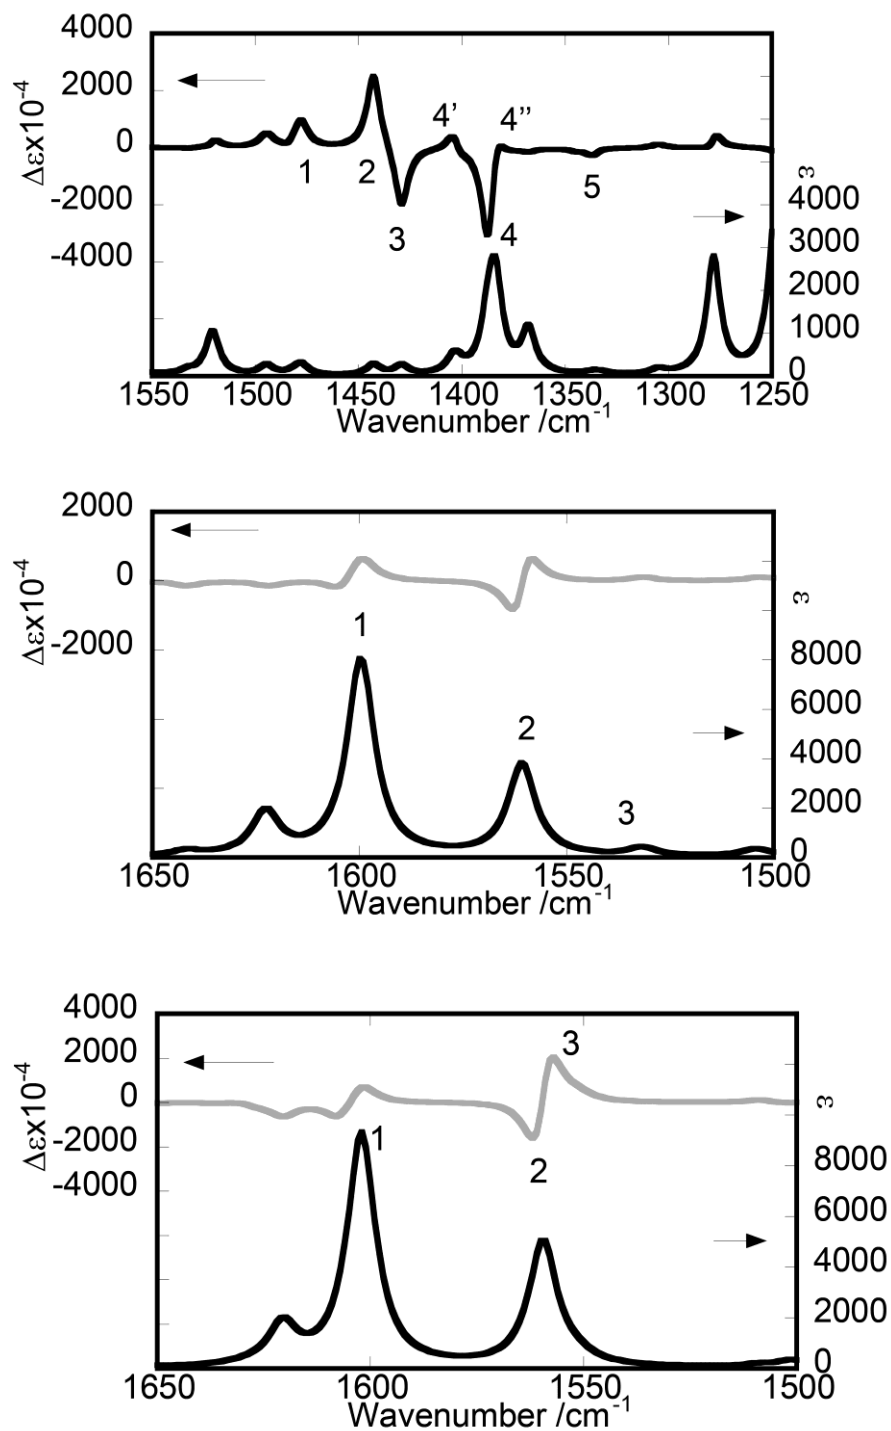

The IR and VCD spectra of Pd(II) complexes were calculated.

**Figure S3.** Calculated IR and VCD spectra:

[{(hfac)Pd(II)}<sub>2</sub>(dabe)] (**6**) (upper) [(bzac)Pd(II)]<sub>2</sub>(taet) (**7a**) (middle) and [(npac)Pd(II)]<sub>2</sub>(taet) (**7b**) (lower)

Table S1 (a) Assignment of VCD [(hfac)Pd(II)]<sub>2</sub>(dabe) (**6**)

| No  | Ligand                 | assignment  | VCD signal sign and wavenumber (cm <sup>-1</sup> ) (experiment)<br>(less retaining fraction) | VCD signal sign and wavenumber (cm <sup>-1</sup> ) (calculation)(S-form) |
|-----|------------------------|-------------|----------------------------------------------------------------------------------------------|--------------------------------------------------------------------------|
| 1   | dabe(CH <sub>3</sub> ) | C-H bending | + 1444                                                                                       | + 1478(in plane)                                                         |
| 2   | dabe                   | C-C-C (C-O) | + 1416                                                                                       | + 1443 (out of phase)                                                    |
| 3   | dabe                   | C-C-C (C-O) | - 1400                                                                                       | - 1430 (in-phase)                                                        |
| 4'  | dabe(CH <sub>3</sub> ) | C-H bending | + 1341                                                                                       | + 1403(out of plane)                                                     |
| 4   | dabe                   | C-C-C       | - 1327                                                                                       | - 1387 (out of phase)                                                    |
| 4'' | dabe                   | C-C-C       | + 1314                                                                                       | + 1384 (in phase)                                                        |
| 5   | dabe(benzyl)           | C-H(benzyl) | - 1302                                                                                       | - 1337                                                                   |

Table S1 (b) Assignment of VCD [ $\{(bzac)Pd(II)\}_2(taet)$ ] (**7a**)

| No | Ligand        | assignment     | VCD signal sign and wavenumber (cm <sup>-1</sup> )<br><br>( <b>experiment</b> ) (more retaining fraction) | VCD signal sign and wavenumber (cm <sup>-1</sup> )<br><br>High/Low<br><br>( <b>calculation</b> ) ( <i>S</i> -form) |
|----|---------------|----------------|-----------------------------------------------------------------------------------------------------------|--------------------------------------------------------------------------------------------------------------------|
| 1  | bzac and taet | C=O stretching | + 1541                                                                                                    | +/- 1604, 1599                                                                                                     |
| 2  | bzac          | C-C-C, C-H     | -/+ 1522, 1510                                                                                            | -/+ 1560 couplet                                                                                                   |
| 3  | bzac          | C-H (benzyl)   | + 1488                                                                                                    | -/+ 1531 couplet                                                                                                   |

Table S1 (c) Assignment of VCD [ $\{(\text{npac})\text{Pd}(\text{II})\}_2(\text{taet})$ ] (**7b**)

| No   | Ligand        | assignment     | VCD signal sign and wavenumber ( $\text{cm}^{-1}$ )<br><b>(experiment)</b><br><br>(more retaining fraction) | VCD signal sign and wavenumber ( $\text{cm}^{-1}$ )<br><br>High/Low<br><b>(calculation)(S-form)</b> |
|------|---------------|----------------|-------------------------------------------------------------------------------------------------------------|-----------------------------------------------------------------------------------------------------|
| 1    | npac and taet | C=O stretching | + 1542                                                                                                      | -/+ 1607, 1602                                                                                      |
| 2,2' | npac          | C-C-C, C-H     | -/+ 1521, 1511                                                                                              | -/+ 1560 couplet                                                                                    |
| 3    | npac          | C-H (naphthyl) | + 1503                                                                                                      | -/+ 1551 couplet                                                                                    |

## S5. The crystal data and the table of selected bond lengths and torsion angles

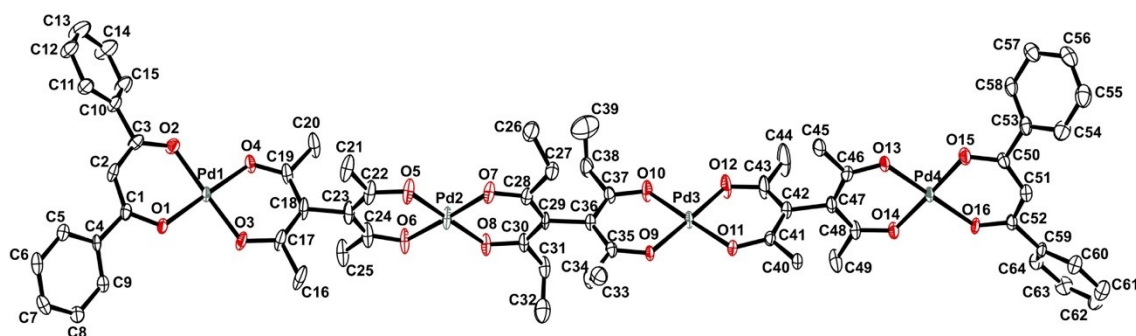

**Figure S5-1.** An ORTEP drawing of  $[\{(\text{dbm})\text{Pd}(\text{II})(\text{taet})\text{Pd}(\text{II})\}_2(\text{tpret})]$  (**5a**) with a numbering scheme of atoms. The thermal ellipsoids are scaled to the 50% probability level. Disordered phenyl group atoms with lower occupancy, hydrogen atoms, and solvent molecules are omitted for clarity.

Table S5-1. Selected bond distances (Å) and torsion angles (deg) of  $[\{(\text{dbm})\text{Pd}(\text{II})(\text{taet})\text{Pd}(\text{II})\}_2(\text{tpret})]$

| Distances (Å) |          |           |          |
|---------------|----------|-----------|----------|
| Pd1 – O1      | 1.970(2) | Pd1 – O2  | 1.968(3) |
| Pd1 – O3      | 1.963(3) | Pd1 – O4  | 1.973(2) |
| Pd2 – O5      | 1.971(3) | Pd2 – O6  | 1.968(3) |
| Pd2 – O7      | 1.957(4) | Pd2 – O8  | 1.970(3) |
| Pd3 – O9      | 1.981(2) | Pd3 – O10 | 1.966(3) |
| Pd3 – O11     | 1.969(3) | Pd3 – O12 | 1.960(3) |
| Pd4 – O13     | 1.961(3) | Pd4 – O14 | 1.965(3) |
| Pd4 – O15     | 1.970(3) | Pd4 – O16 | 1.990(2) |



---

Torsion angles (deg)

|                       |         |                       |         |
|-----------------------|---------|-----------------------|---------|
| C19 – C18 – C23 – C22 | 82.4(6) | C28 – C29 – C36 – C35 | 85.3(5) |
| C43 – C42 – C47 – C46 | 85.2(5) |                       |         |

---

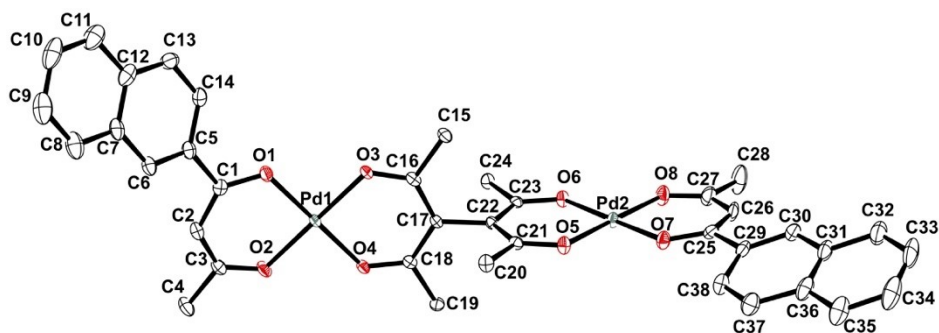

**Figure S5-2.** An ORTEP drawing of [ $\{(\text{npac})\text{Pd}(\text{II})\}_2(\text{taet})$ ] (**7b**) with a numbering scheme of atoms. The thermal ellipsoids are scaled to the 50% probability level. Hydrogen atoms, and solvent molecules are omitted for clarity.

Table S5-2. Selected bond distances (Å) and torsion angle (deg) of [ $\{(\text{npac})\text{Pd}(\text{II})\}_2(\text{taet})$ ]

---

| Distances (Å) |          |          |          |
|---------------|----------|----------|----------|
| Pd1 – O1      | 1.992(3) | Pd1 – O2 | 1.982(2) |
| Pd1 – O3      | 1.963(2) | Pd1 – O4 | 1.973(2) |
| Pd2 – O5      | 1.963(2) | Pd2 – O6 | 1.973(2) |
| Pd2 – O7      | 1.977(3) | Pd2 – O8 | 1.999(3) |

---

| Torsion angle (deg)   |         |
|-----------------------|---------|
| C16 – C17 – C22 – C21 | 86.3(3) |

---
